# Supplementary material for: Compound haploinsufficiency of Dok2 and Dusp4 promotes lung tumorigenesis
Source: JCI journal article supplement (doi:10.1172/jci99699), 2018-11-25

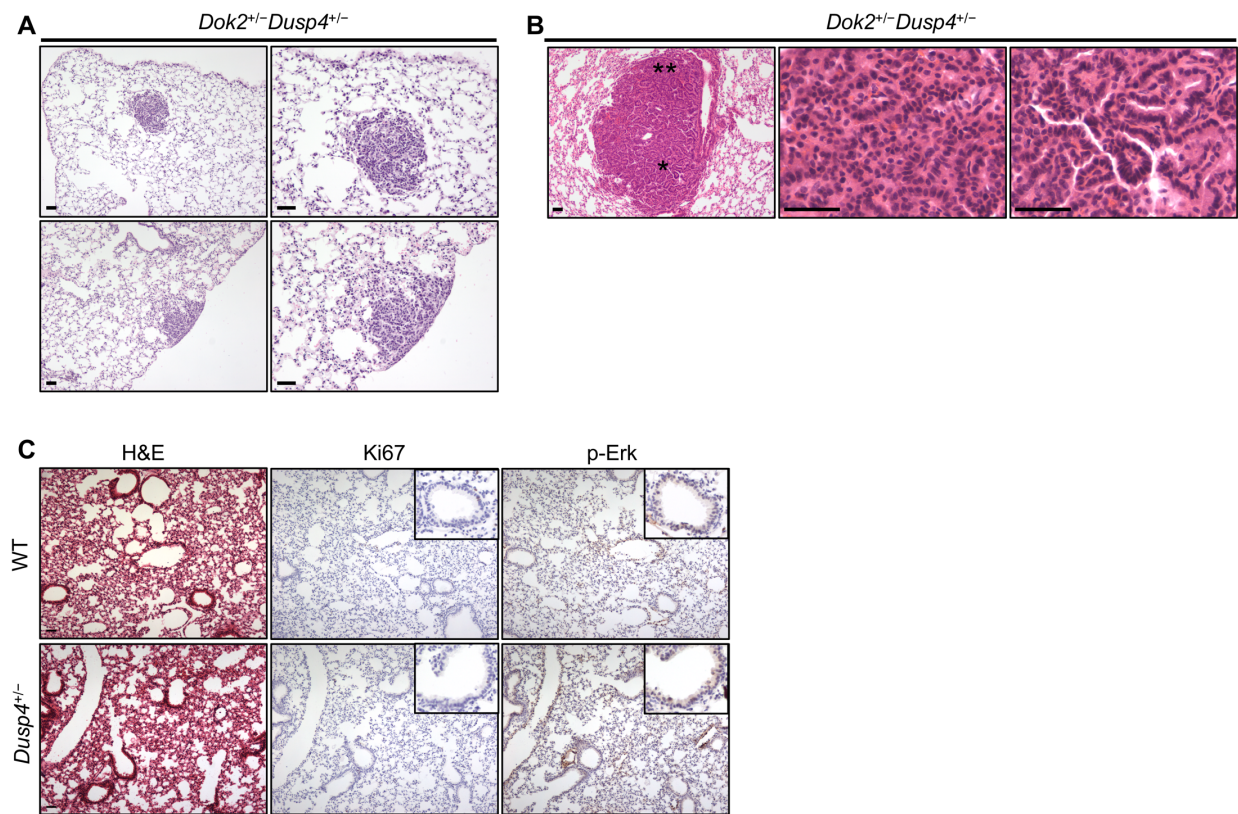

**Supplemental Figure 1. Histopathology of lung tumors in *Dok2<sup>+/-</sup>Dusp4<sup>+/-</sup>* mice.** (A) H&E-stained adenocarcinoma from lung tissue of two *Dok2<sup>+/-</sup>Dusp4<sup>+/-</sup>* mice at 9 months of age. Scale bar, 50  $\mu$ m. (B) H&E-stained adenocarcinoma with papillary features (\*) and solid growth areas (\*\*) from a *Dok2<sup>+/-</sup>Dusp4<sup>+/-</sup>* lung. Middle, close-up of solid growth region. Right, close-up of papillary growth region. Scale bar, 50  $\mu$ m. (C) Serial sections of lung tissue stained with H&E and IHC for phosphorylated Erk and Ki67 from 18-month old WT and *Dusp4<sup>+/-</sup>* mice. Scale bars, 50  $\mu$ m. Insets show the staining from enlarged normal lung tissues.

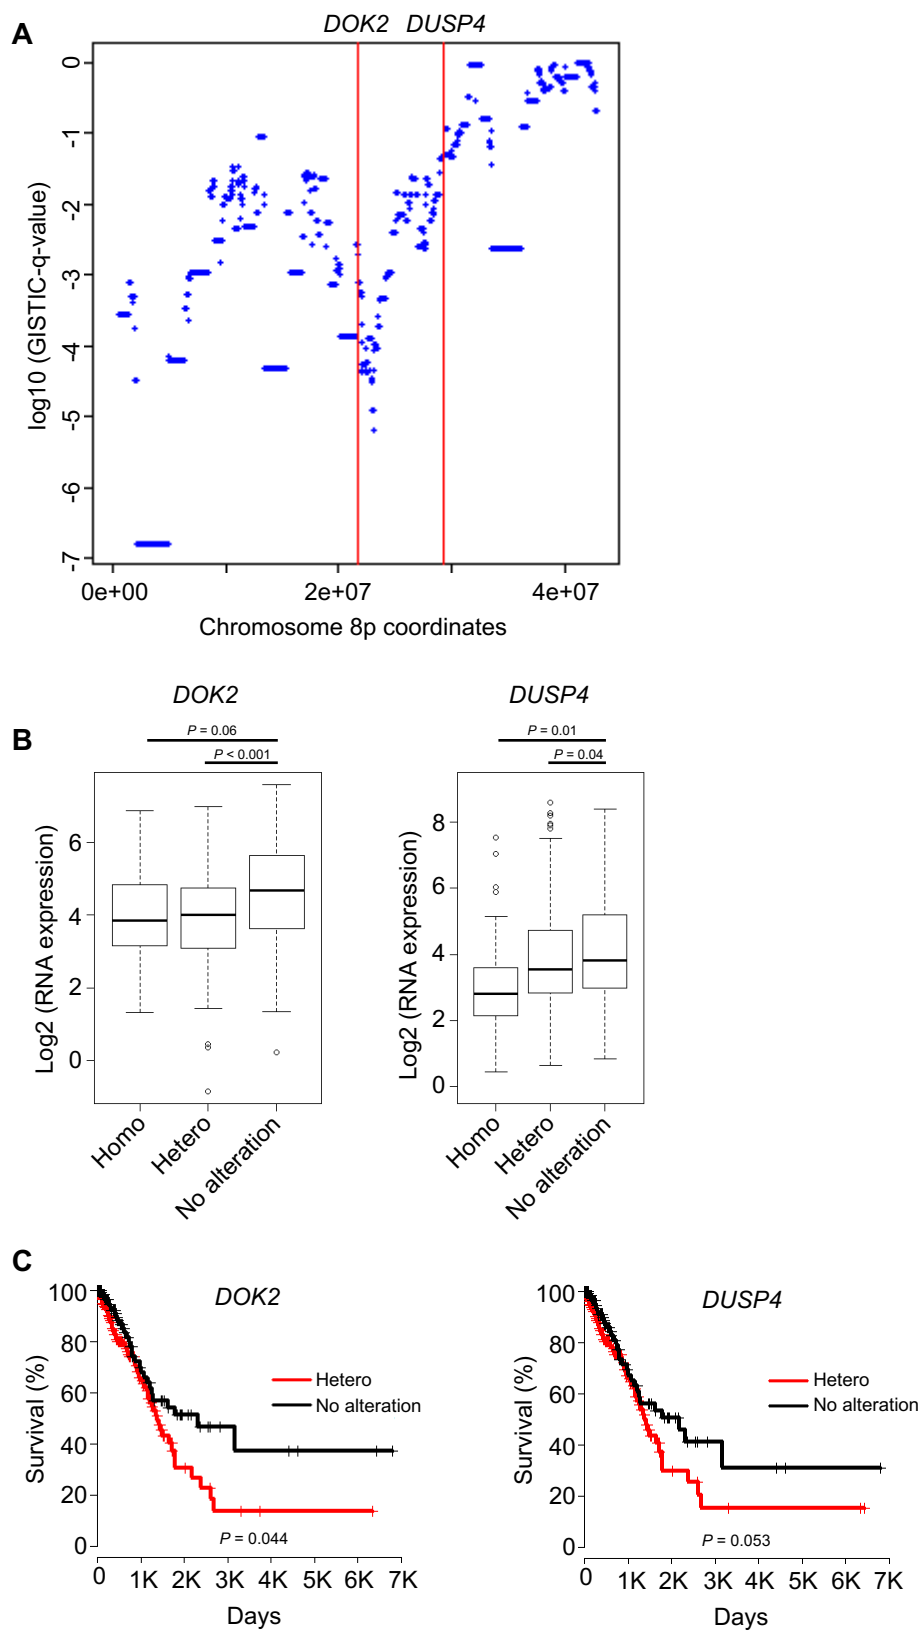

**Supplemental Figure 2. Compound loss of *DOK2* and *DUSP4* expression and its clinical implication in human lung adenocarcinomas.** (A) Size and extent of chromosome 8p deletions (in blue) from individual lung adenocarcinomas based on aCGH data analysis. Red line indicates genomic position of *DOK2* and *DUSP4*. (B) A plot shows the correlation of copy number and gene expression level for *DOK2* and *DUSP4* in lung cancer samples. (C) The comparison of overall Kaplan-Meier survival curve between lung adenocarcinoma patients with no alteration versus heterozygous loss for *DOK2* or *DUSP4*. *P* values were determined by log-rank test.

Full unedited gel for Figure 2D

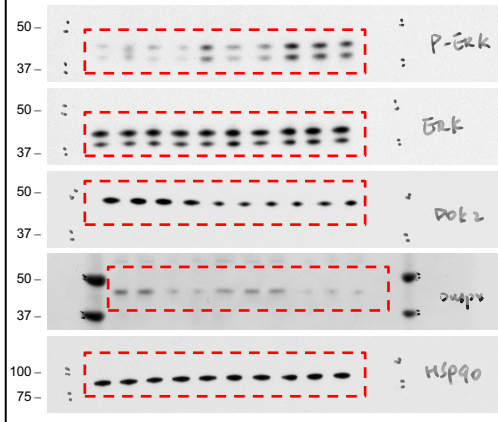

Full unedited gel for Figure 3A

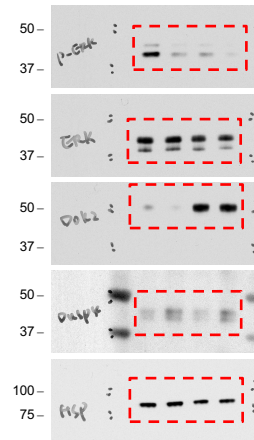

Full unedited gel for Figure 3B

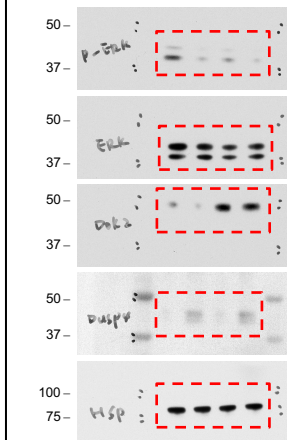

Full unedited gel for Figure 3C

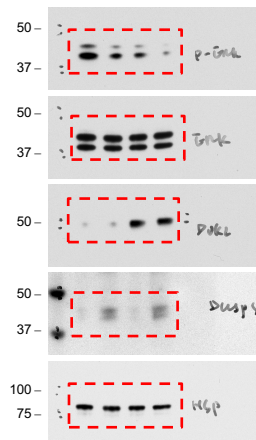

Full unedited gel for Figure 3G

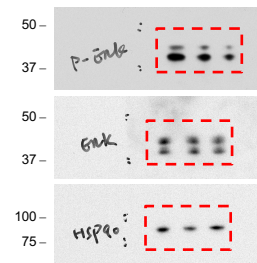



Full unedited gel for Figure 2D



Full unedited gel for Figure 3A

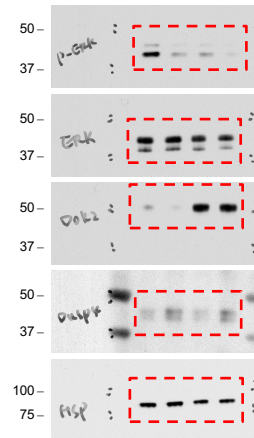

Full unedited gel for Figure 3B

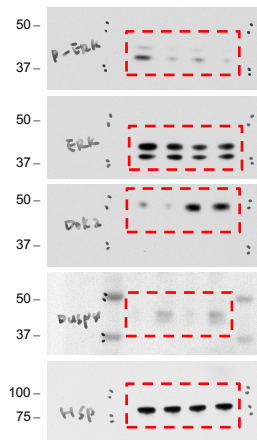

Full unedited gel for Figure 3C



Full unedited gel for Figure 3G



Supplement: sd1 [file 1]
